# Supplementary material for: NO up-regulates migraine-related CGRP via activation of an Akt/GSK-3β/NF-κB signaling cascade in trigeminal ganglion neurons
Source: publisher site journal article supplement (doi:10.18632/aging.103031), 2020-04-10
Supplement: Supplementary file [file aging-v12i7-103031-supplementary-material-SD1.pdf]

## SUPPLEMENTARY FIGURES

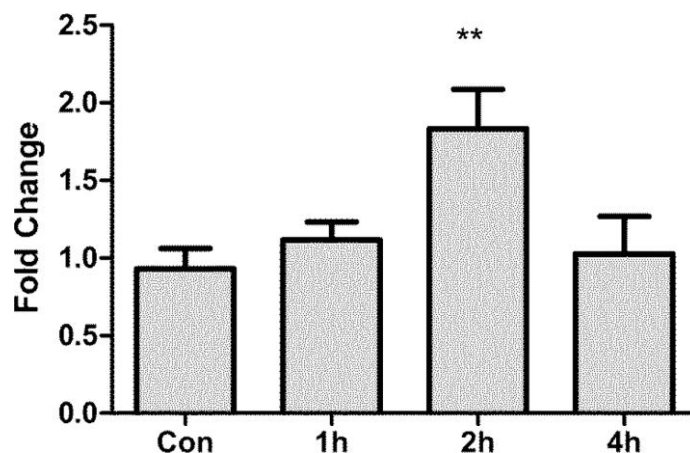

**Supplementary Figure 1. SNAP induces CGRP expression in a time-dependent manner.** Cultured primary cells were treated with 1.0 mM SNAP for 1 h, 2 h or 4 h, followed by culture in NB medium without SNAP for an additional 24 h. After treatment, qPCR was performed to monitor expression of CGRP in cells. \*\* $p < 0.01$  vs untreated control.

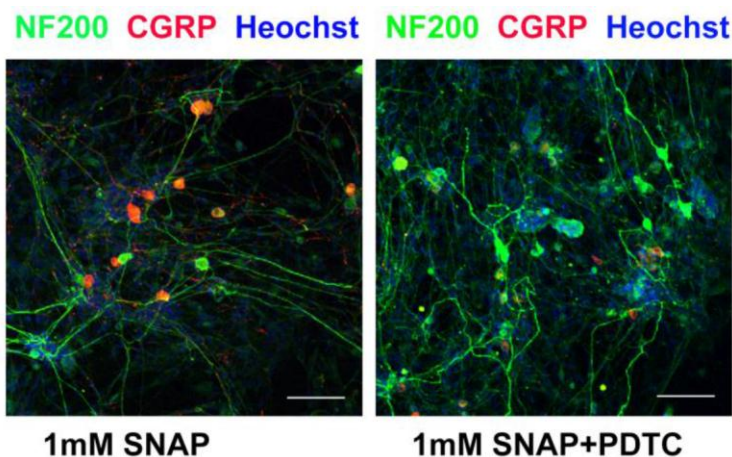

**Supplementary Figure 2. The NF- $\kappa$ B inhibitor PDTC prevents SNAP-induced CGRP in TGNs.** Cultured primary cells were pre-treated with 50  $\mu$ M PDTC for 30 min, followed by exposure to 1.0 mM SNAP for 2 h. After culturing in inhibitor- and SNAP-free medium for an additional 24 h, cells were double stained with primary antibodies against CGRP (red fluorescence) and NF200 (green, a marker of neuron) and counterstained with Hechst33342 for nuclei (blue). Scale bar = 20  $\mu$ m.

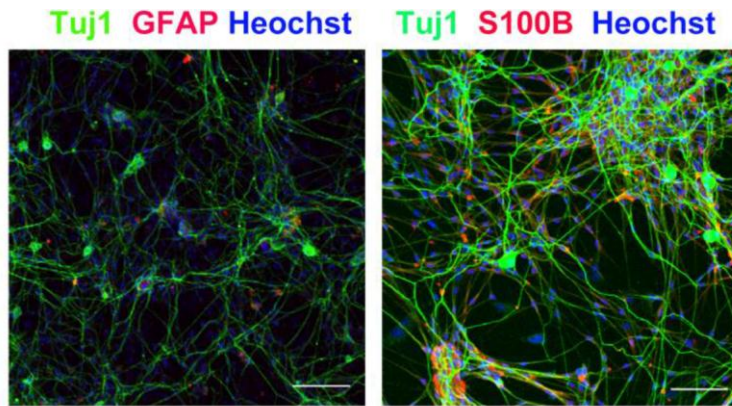

**Supplementary Figure 3. Immunofluorescent staining indicates that a majority of cultured cells are neurons in cultured cells.** Primary cells obtained from 3-day-old Wistar rats ( $n = 9$ ) were cultured as described in Materials and Methods, and subjected to double immunofluorescent staining for Tuj1 (a marker of neurons; green) and GFAP (a marker of glial cells; red) or S100B (a marker of Schwann cells; red), and counterstained with Hechst33342 for nuclei (blue). Scale bar = 20  $\mu\text{m}$ .
